# Supplementary material for: Promoting antigen escape from dendritic cell endosomes potentiates anti-tumoral immunity
Source: PubMed Central journal article supplement (PMC9040180; doi:10.1016/j.xcrm.2022.100534), 2022-02-25
Supplement: mmc1.pdf [file mmc1.pdf]

**Cell Reports Medicine, Volume 3**

**Supplemental information**

**Promoting antigen escape from dendritic cell  
endosomes potentiates anti-tumoral immunity**

**Jean-Pierre Bikorimana, Natasha Salame, Simon Beaudoin, Mohammad Balood, Théo Crosson, Jamilah Abusarah, Sebastien Talbot, Raimar Löbenberg, Sebastien Plouffe, and Moutih Rafei**

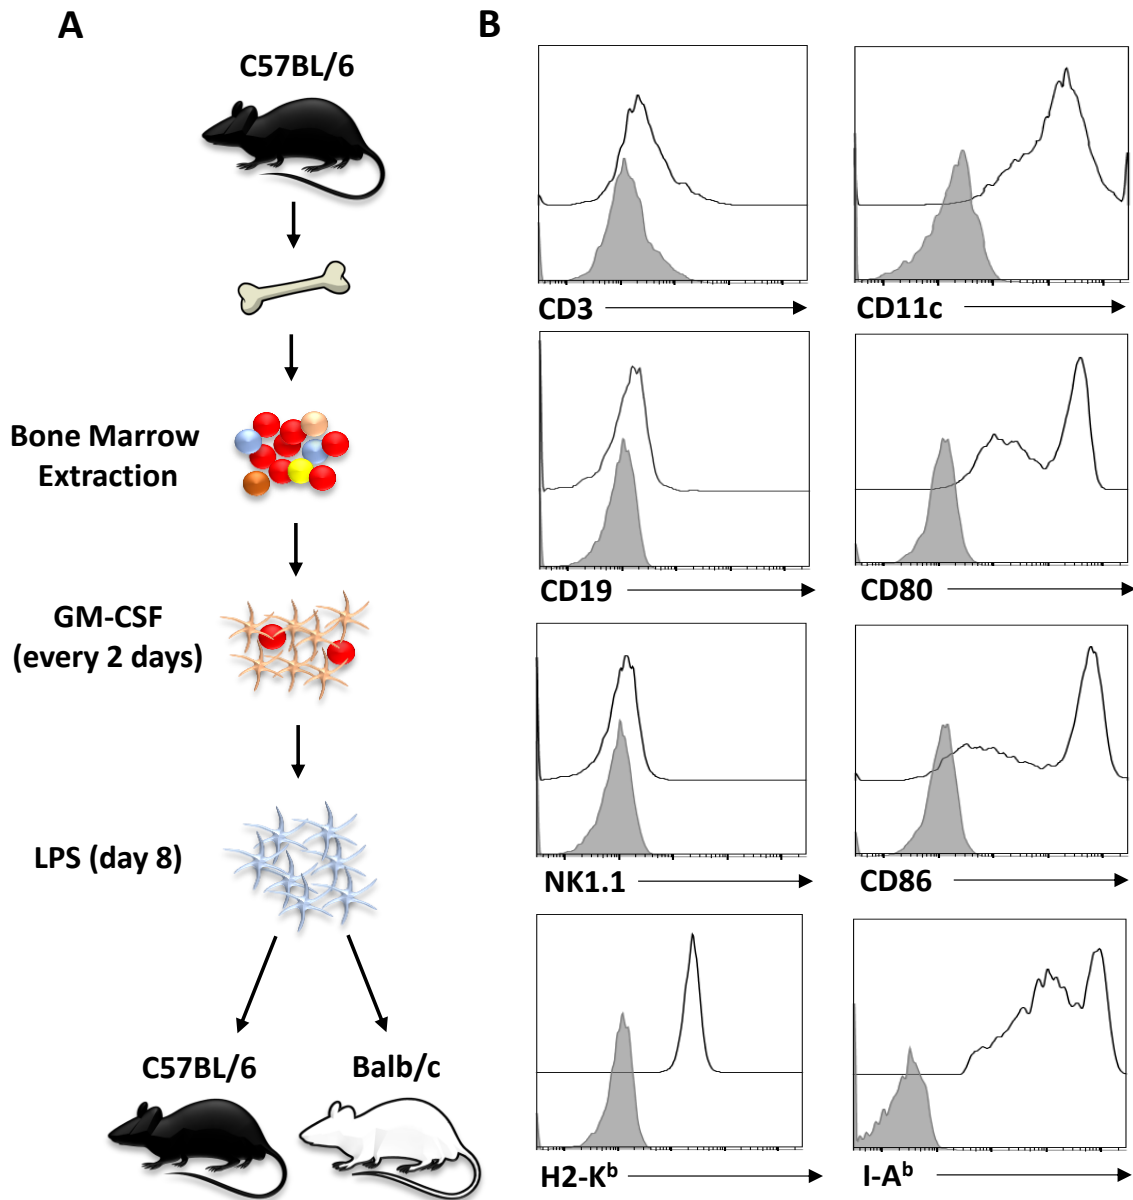

**Supplementary figure 1: Generation and characterisation of BM-derived DC for vaccination.** **A)** To generate BM-derived mature DCs, femur and tibias of female C57BL/6 or Balb/c mice are flushed to collect total nucleated cells. Cells are then plated for 8 days with recombinant GM-CSF (10 ng/ml) and replaced every 2 days. LPS is added on day 9 to trigger DC maturation prior to antigen pulsing. **B)** Representative flow-cytometry analysis of mature DC phenotype. No T cells, B cells or NK cells were detected at day 9. More than 80% of *ex vivo* generated mature DCs expressed CD11c<sup>+</sup>, CD80<sup>+</sup>, CD86<sup>+</sup>, and I-A<sup>b</sup><sup>+</sup>. Related to figures 2, 4, 5 and 6.

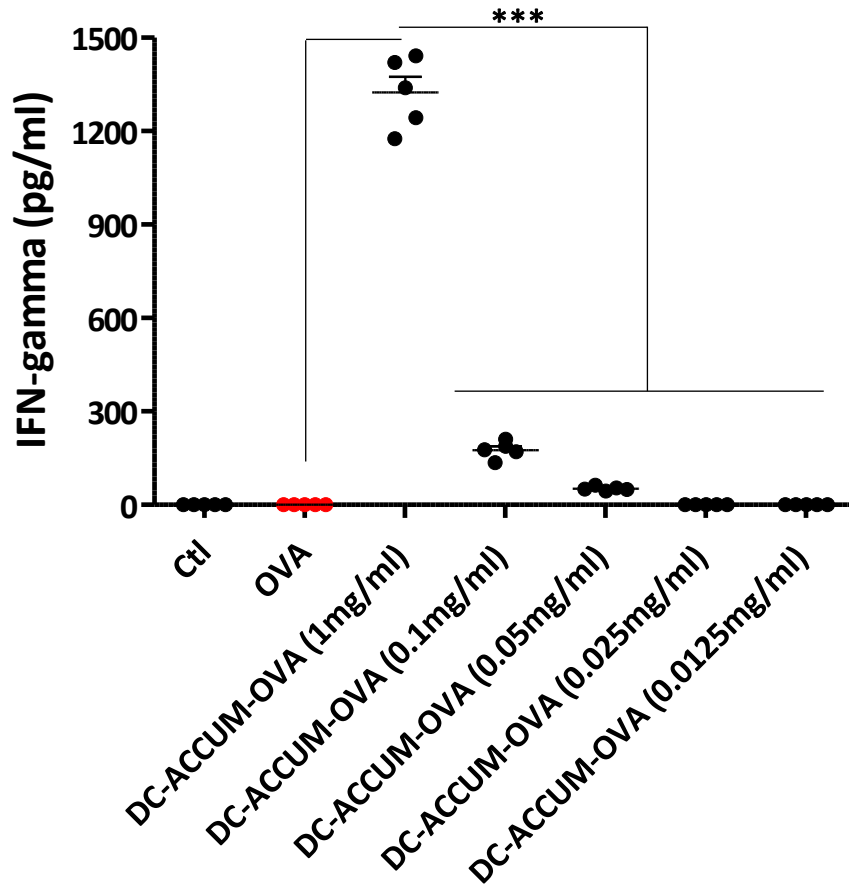

**Supplementary figure 2: Quantification of IFN-gamma production by OT-II T cells.** An antigen presentation assay was conducted using OT-II-derived CD4 T cells co-cultured with decreasing concentration of aOVA-pulsed mature DCs versus nOVA-pulsed mature DCs (shown in red). Three days following the co-culture, IFN-gamma was quantified using a commercial ELISA. For this panel, n=5/group with \*\*\*P<0.001. Related to figure 2.

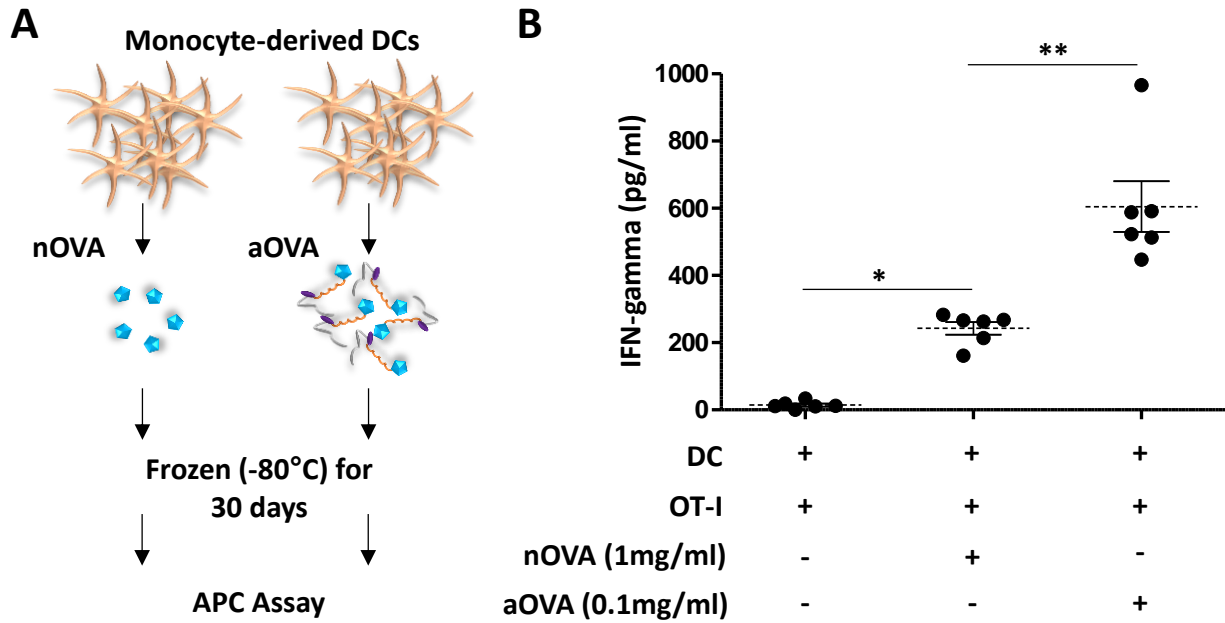

**Supplementary figure 3: Frozen aOVA-pulsed mature DCs retain their potency to activate CD8 T cells. A)**

Representative cartoon of the experimental setting. **B)** Antigen presentation assay using frozen mature DCs

originally pulsed with nOVA or aOVA. For this panel, n=6/group with \*P<0.05 and \*\*P<0.01. Related to figure 2.

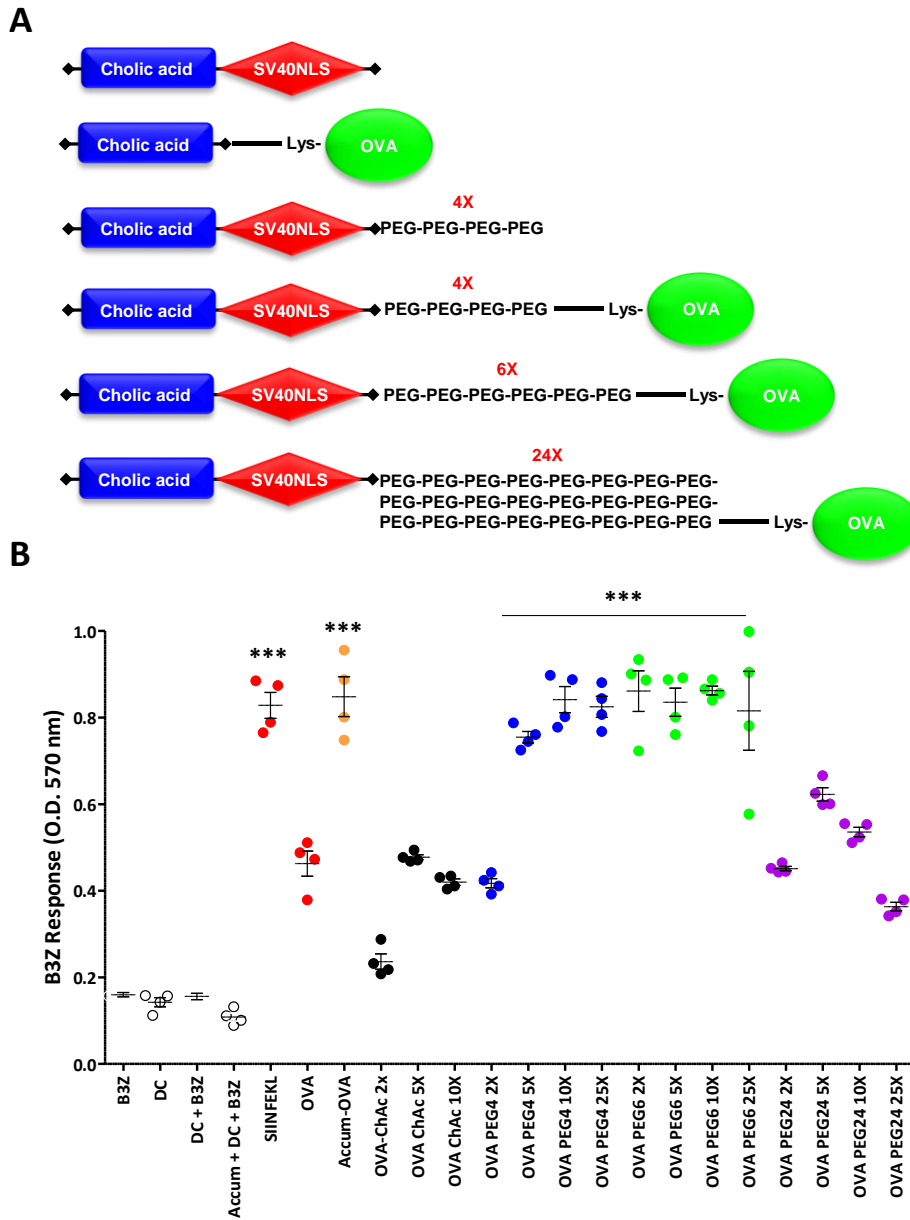

**Supplementary figure 4: Testing the effect of various aOVA variants on the efficacy of antigen presentation by DCs.** **A)** Representative cartoon of the various variants. The numbers 4X, 6X and 24X refers to the number of PEG molecules per Accum construct. The Accum-OVA is represented in the three-cartoon containing Cholic acid, SV40NLS, PEG and OVA. **B)** Response quantification using the SIINFEKL-specific B3Z cell line co-cultured with mature DCs treated with the different variants. The numbers 2X, 5X, 10X, and 25X refers to the number of Accum molecule per OVA. For this panel, n=5/group with \*\*\*P<0.001 when compared to the nOVA group. Related to figure 2.

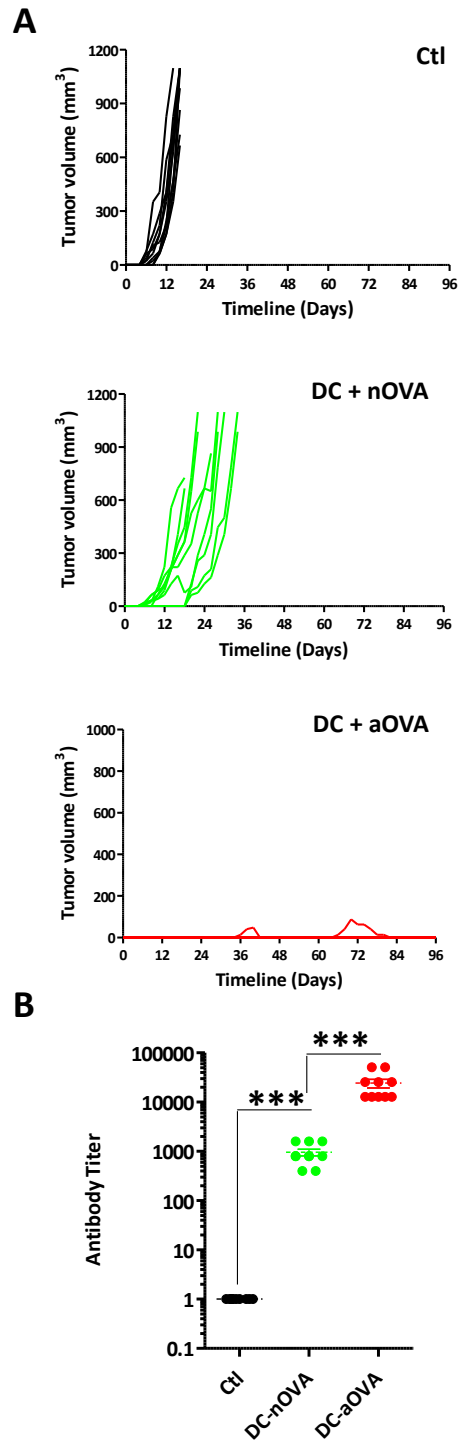

**Supplementary figure 5: Individual tumor measurements and antibody tiers form the prophylactic vaccination experiment.** **A)** Individual tumor measurements for EG.7 tumor growth in control mice (in black), OVA-pulsed mature DC-vaccinated mice (green) or Accum-OVA-pulsed mature DCs (red). **B)** Assessment of anti-OVA IgG titer by ELISA. For this experiment, n=10/group with \*\*\*P<0.001. Related to figure 4.

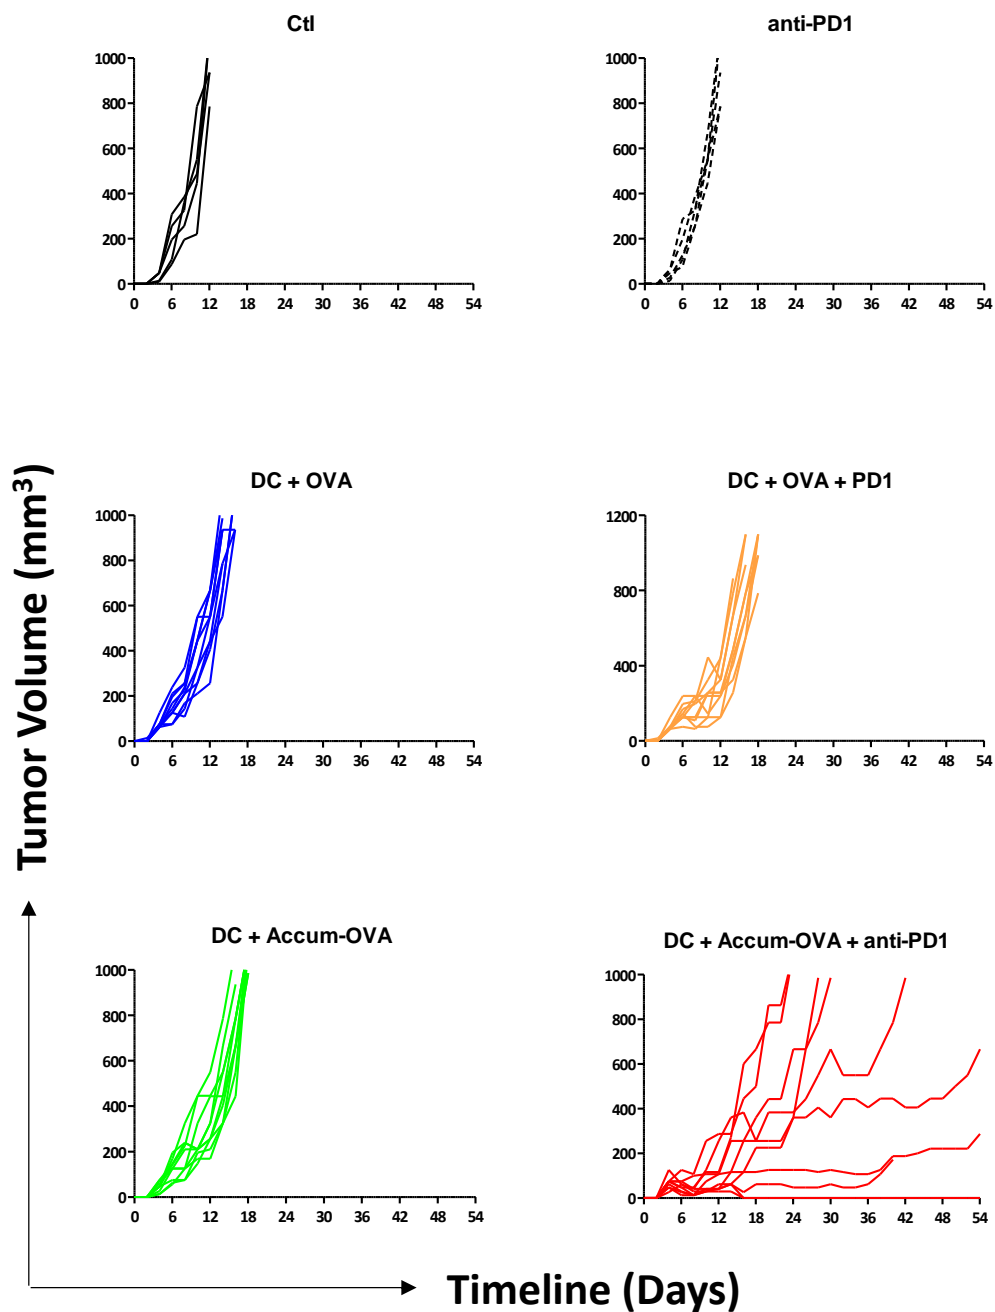

**Supplementary figure 6: Individual tumor measurements from the syngeneic therapeutic vaccination study targeting EG.7 lymphoma.** Individual tumor measurements for EG.7 tumor growth in control mice (in black), anti-PD-1-injected mice (black dotted lines), OVA-pulsed mature DC-vaccinated mice (blue), OVA-pulsed mature DC-vaccinated mice receiving anti-PD-1 (orange), Accum-OVA-pulsed mature DCs (green), or Accum-OVA-pulsed mature DCs receiving anti-PD-1 (red). For this experiment, n=10/group. Related to figure 5.

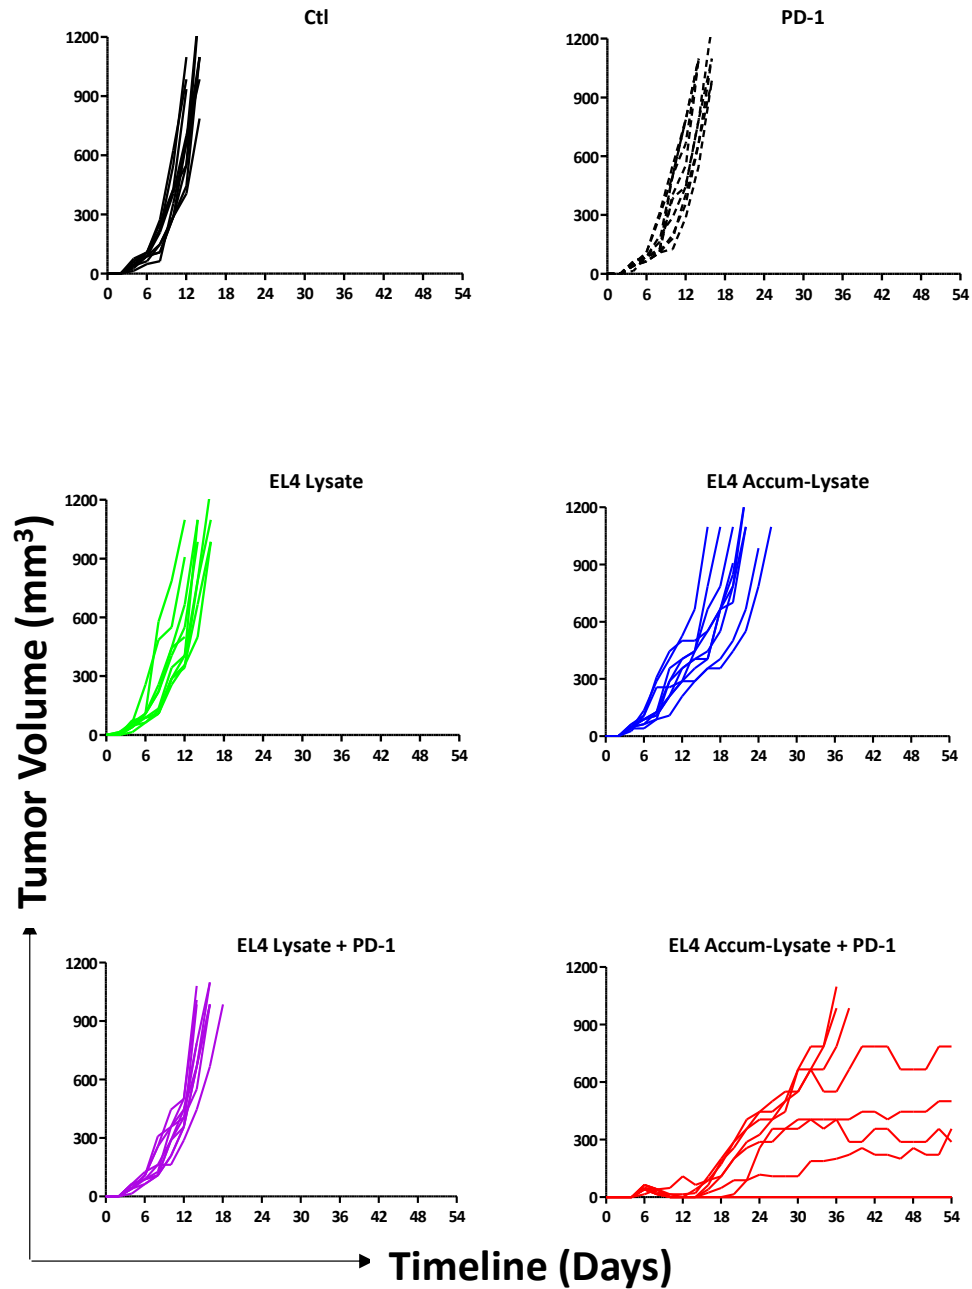

**Supplementary figure 7: Individual tumor measurements from the allogeneic therapeutic vaccination**

**targeting EL4 lymphoma.** Individual tumor measurements for EL4 tumor growth in control mice (in black), anti-PD-1- injected mice (black dotted lines), EL4 lysate-pulsed mature DC-vaccinated mice (green), EL4 Accum-lysate-pulsed mature DC-vaccinated mice (blue), EL4 lysate-pulsed mature DC-vaccinated mice receiving anti-PD-1 (purple), or EL4 Accum-lysate-pulsed mature DC-vaccinated mice receiving anti-PD-1 (red). For this experiment, n=10/group. Related to figure 6.



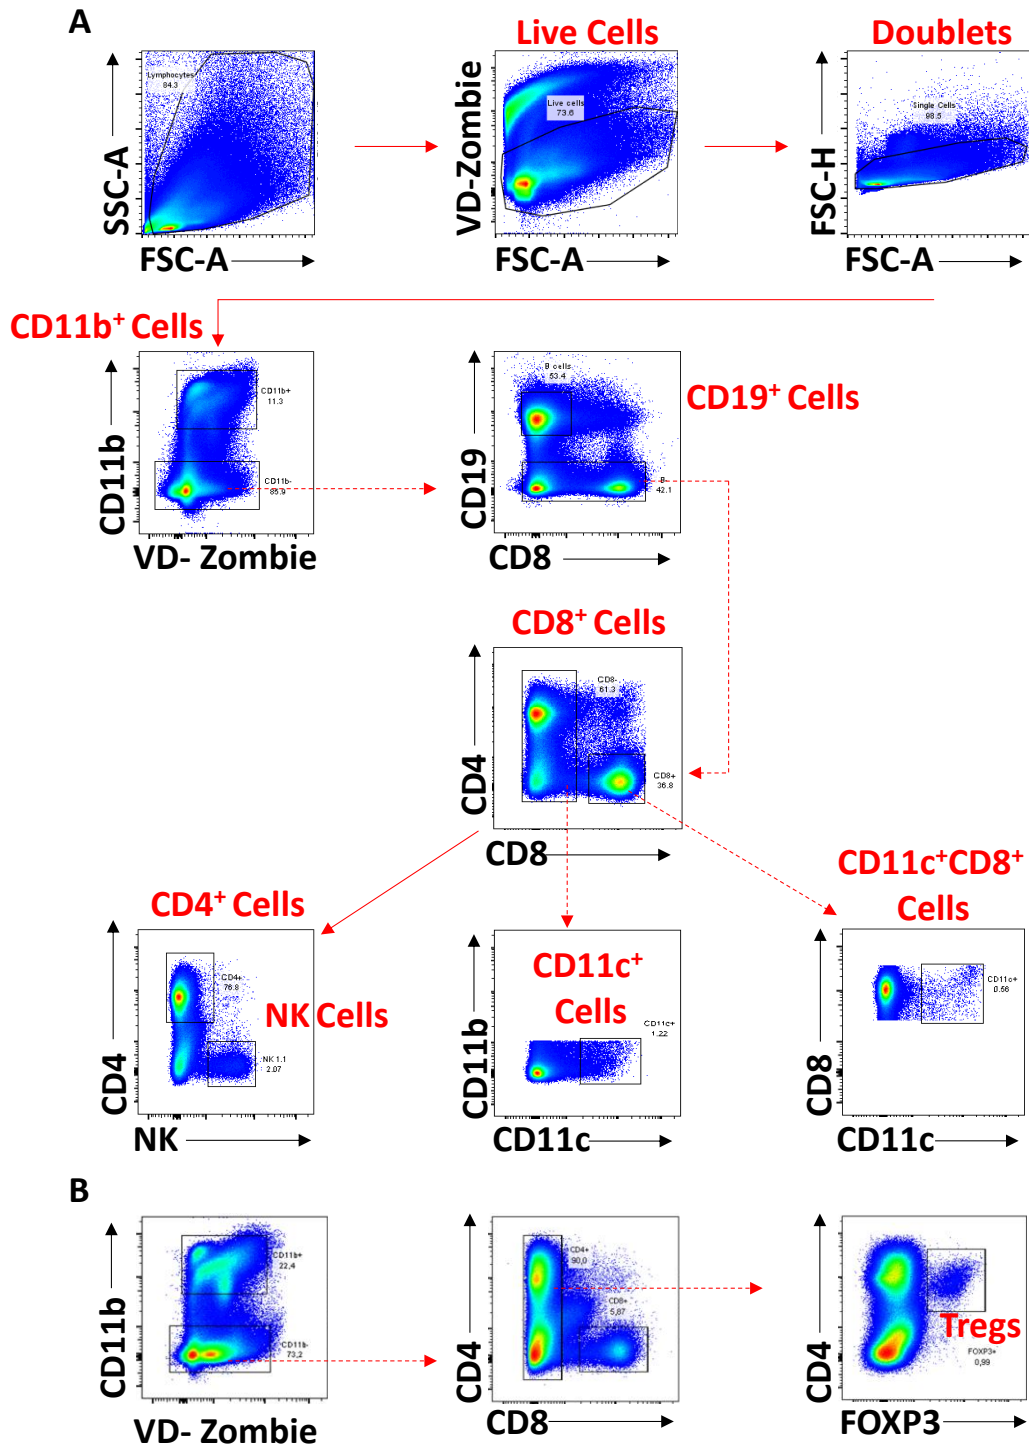

**Supplementary figure 8: Gating strategies used for the TIL study. A)** A representative gating strategy to demonstrate how various immune cells were identified. **B)** A representative gating strategy used to identify Tregs. Related to figure 6.
